# Supplementary material for: Mental Imagery Skills in Competitive Young Athletes and Non-athletes
Source: Front Psychol. 2020 Apr 17;11:633. doi: 10.3389/fpsyg.2020.00633 (PMC7180224; doi:10.3389/fpsyg.2020.00633)
Supplement: DATA SHEET S1 — Datasets for this study. [file Data_Sheet_1.xlsx]

## Sheet: Data Sheet 1
Age	Sex (1m, 2 f)	Group (1 contr., 2 sperim)	Vis_lett	F	Clock	Cubo	Sottr_parti	Espl_mappa	Perc_immag	Rappr_ment_ogg	IM_Totale	Span_av	Span_ind	Span_tot	Mem_visspaz	Mem_ogg	Mem_ogg_pos	Mem_ogg_TOT	Ripr_spec_posiz_spaz
8	2	1	12	5	0	0	11	6	4	18	56	6	3	9	5	7	2	9	17
8	2	1	5	3	0	2	0	4	5	17	36	4	4	8	3	7	12	19	2
8	2	1	12	5	4	0	0	6	0	16	43	6	0	6	3	6	10	16	15
8	2	1	12	4	0	2	0	4	6	16	44	4	0	4	2	5	6	11	3
8	1	1	11	6	4	0	6	4	7	10	48	6	0	6	3	6	4	10	5
8	1	1	11	4	2	0	0	6	0	9	32	4	0	4	3	4	6	10	7
8	1	1	12	6	4	4	1	4	5	12	48	6	0	6	7	6	6	12	8
8	1	1	10	0	4	0	0	3	3	12	32	4	0	4	2	3	5	8	3
9	1	1	12	6	4	2	4	5	4	19	56	5	3	8	6	6	10	16	10
9	2	1	11	0	2	2	2	2	0	8	27	0	0	0	2	0	0	0	6
9	2	1	10	6	2	4	6	6	8	18	60	4	4	8	7	6	8	14	15
9	1	1	12	5	4	4	0	6	7	20	58	0	0	0	3	6	10	16	18
9	2	1	12	6	4	4	5	4	5	12	52	2	0	2	3	5	6	11	10
9	2	1	11	10	4	4	8	6	8	10	61	6	3	9	2	7	10	17	10
9	1	1	12	8	0	0	2	4	9	17	52	5	3	8	13	6	10	16	10
9	1	1	10	6	0	0	6	4	5	15	46	4	3	7	5	6	6	12	0
10	1	1	12	10	0	2	7	6	8	17	62	6	4	10	10	7	12	19	9
10	2	1	12	10	0	6	8	4	8	18	66	5	4	9	9	7	12	19	17
10	2	1	10	4	2	2	7	5	0	8	38	0	0	0	0	4	2	6	2
10	2	1	10	0	0	0	0	0	0	9	19	0	0	0	0	2	2	4	5
10	1	1	10	4	2	2	5	5	0	9	37	0	0	0	0	0	0	0	2
10	2	1	8	2	2	2	4	4	4	5	31	0	0	0	0	4	2	6	0
10	1	1	10	0	0	2	6	2	0	4	24	0	0	0	0	4	2	6	4
10	1	1	5	4	2	2	4	2	0	6	25	0	0	0	0	2	2	4	6
11	1	1	9	5	0	0	1	4	7	14	40	4	0	4	2	3	7	10	7
11	2	1	10	6	0	0	10	5	5	18	54	5	3	8	0	6	8	14	0
11	2	1	9	4	0	2	8	4	3	10	40	5	3	8	0	5	7	12	10
11	2	1	8	3	0	0	4	4	3	16	38	4	2	6	1	6	9	15	16
11	2	1	8	3	0	2	6	6	7	17	49	3	3	6	0	7	6	13	10
11	1	1	10	3	0	2	4	3	6	18	46	4	2	6	0	6	4	10	14
11	1	1	8	3	0	0	6	4	5	18	44	4	3	7	0	5	9	14	9
11	1	1	7	1	2	0	12	6	4	18	50	5	4	9	4	6	7	13	18
12	2	1	12	3	0	0	10	6	6	18	55	5	2	7	0	6	8	14	18
12	2	1	11	5	0	0	10	1	4	16	47	6	2	8	0	4	8	12	10
12	1	1	12	5	0	2	6	5	6	13	49	5	2	7	0	6	6	12	16
12	1	1	11	5	0	0	5	4	5	18	48	5	3	8	2	5	7	12	18
12	2	1	12	5	0	0	6	3	4	16	46	6	2	8	0	7	6	13	10
12	2	1	6	4	0	0	5	4	5	14	38	5	2	7	1	5	6	11	12
12	1	1	11	2	0	0	4	4	4	13	38	4	3	7	2	5	5	10	0
12	1	1	6	3	0	0	1	2	2	9	23	4	2	6	2	6	3	9	4
13	2	1	12	4	0	0	8	3	4	17	48	5	3	8	1	6	5	11	12
13	2	1	10	3	4	0	10	4	5	18	54	5	3	8	3	7	5	12	18
13	2	1	11	0	2	1	5	4	2	15	40	4	2	6	0	4	2	6	18
13	2	1	10	2	2	0	6	3	6	19	48	5	2	7	0	6	6	12	10
13	1	1	10	5	4	0	6	1	3	13	42	5	3	8	0	5	7	12	5
13	1	1	7	3	2	0	7	2	3	16	40	3	3	6	0	5	8	13	12
13	1	1	7	4	0	0	5	4	3	14	37	4	2	6	2	4	6	10	11
13	1	1	12	2	0	0	5	4	8	15	46	4	3	7	2	5	5	10	18
8	2	2	12	10	0	0	12	6	11	19	70	5	4	9	7	9	7	16	19
8	1	2	12	10	0	0	12	6	9	19	68	5	4	9	11	7	12	19	12
8	2	2	12	4	0	0	6	6	2	17	47	4	2	6	11	7	12	19	13
8	2	2	12	3	0	0	9	5	7	16	52	6	3	9	11	7	7	14	13
8	1	2	12	5	0	2	12	4	7	19	61	5	3	8	16	7	12	19	16
8	1	2	11	6	0	2	8	2	5	20	54	5	4	9	19	6	7	13	12
8	1	2	12	10	0	2	9	4	7	19	63	4	4	8	11	7	10	17	17
8	2	2	12	8	0	2	12	6	2	18	60	4	4	8	4	7	12	19	14
9	2	2	12	10	0	0	7	4	8	17	58	5	4	9	19	7	8	15	14
9	1	2	12	9	2	6	12	6	9	19	75	6	5	11	18	7	11	18	15
9	1	2	12	8	0	4	11	6	10	18	69	5	5	10	19	7	12	19	18
9	2	2	12	6	0	0	5	4	2	17	46	5	3	8	19	5	8	13	13
9	2	2	12	7	0	8	6	6	8	19	66	5	6	11	12	6	12	18	15
9	2	2	12	10	0	0	9	4	6	19	60	6	4	10	19	6	12	18	16
9	1	2	11	10	0	0	10	4	9	18	62	4	3	7	19	6	12	18	18
9	1	2	12	10	0	0	12	4	9	19	66	6	4	10	17	6	12	18	17
10	1	2	12	10	0	4	10	6	5	19	66	4	2	6	19	7	8	15	15
10	2	2	12	10	0	2	12	6	11	19	72	6	4	10	19	7	12	19	13
10	1	2	11	6	0	6	12	6	11	18	70	4	4	8	14	7	6	13	17
10	2	2	12	7	0	0	6	6	4	18	53	4	3	7	19	7	10	17	12
10	2	2	12	10	0	0	12	6	6	18	64	5	3	8	10	7	10	17	15
10	1	2	11	4	0	8	9	6	9	18	65	4	3	7	10	6	7	13	15
10	1	2	12	6	0	2	12	4	8	19	63	4	3	7	19	7	8	15	16
10	2	2	12	9	0	0	12	4	6	18	61	5	3	8	10	7	9	16	15
11	1	2	11	4	0	4	4	4	5	18	50	4	3	7	5	6	7	13	12
11	1	2	12	10	0	8	12	6	7	19	74	6	6	12	19	7	10	17	17
11	1	2	12	9	0	0	5	6	10	17	59	6	3	9	19	6	8	14	11
11	1	2	12	10	0	0	11	6	10	19	68	5	2	7	19	6	11	17	15
11	2	2	12	6	0	2	7	6	6	19	58	5	5	10	19	7	8	15	15
11	2	2	12	8	0	0	11	6	7	18	62	5	4	9	19	6	12	18	17
11	2	2	12	6	2	0	12	6	3	19	60	6	4	10	19	7	11	18	14
11	2	2	12	9	0	2	12	6	11	18	70	6	4	10	16	6	5	11	13
12	1	2	12	2	0	2	7	4	8	19	54	5	3	8	8	7	8	15	17
12	2	2	12	2	0	0	12	6	6	19	57	5	3	8	11	7	6	13	10
12	2	2	12	4	0	0	11	6	11	19	63	6	6	12	16	7	11	18	18
12	1	2	12	7	0	2	12	5	11	18	67	6	5	11	15	7	12	19	16
12	1	2	12	10	0	0	12	6	11	20	71	6	4	10	19	7	8	15	18
12	1	2	12	10	0	0	10	6	7	18	63	5	3	8	19	7	10	17	16
12	2	2	12	6	0	0	11	6	7	17	59	4	3	7	19	6	6	12	15
12	2	2	12	10	0	4	12	6	11	20	75	6	4	10	19	7	12	19	18
13	1	2	12	5	0	0	10	4	9	20	60	5	5	10	19	7	12	19	18
13	2	2	12	10	0	2	11	6	9	20	70	5	3	8	19	7	12	19	17
13	1	2	12	10	0	0	10	6	5	19	62	5	4	9	13	5	10	15	12
13	1	2	12	10	0	2	12	4	11	19	70	6	5	11	19	6	8	14	18
13	1	2	12	4	0	4	9	3	5	17	54	5	3	8	11	5	7	12	17
13	2	2	11	3	0	0	12	6	6	19	57	6	4	10	5	7	9	16	15
13	2	2	12	4	0	0	8	6	5	19	54	5	4	9	19	7	12	19	18
13	2	2	12	10	0	2	12	4	7	20	67	6	5	11	19	6	8	14	18

## Sheet: Foglio2
			SESSO				NUEMRO DI ALLENAMENTI SETTINAMANALI
			M=1
			F=2
